# Supplementary material for: Sensitive recognition of ethion in food samples using turn-on fluorescence N and S co-doped graphene quantum dots
Source: Royal Society of Chemistry journal article supplement (doi:10.1039/c7ay02850d), 2018-01-01
Supplement: c7ay02850d1.pdf [file c7ay02850d1.pdf]

## Supplementary data

**Table S1.**  $K_{SV}$  values for different temperatures.

| Temperature ( $^{\circ}\text{C}$ ) | Stern–Volmer equation       | $K_{SV}$ value ( $\mu\text{M}^{-1}$ ) | $R^2$  |
|------------------------------------|-----------------------------|---------------------------------------|--------|
| 25                                 | $F_0/F = 1.0398 + 0.043[C]$ | 0.043                                 | 0.9938 |
| 30                                 | $F_0/F = 1.0514 + 0.055[C]$ | 0.055                                 | 0.9936 |
| 37                                 | $F_0/F = 1.0881 + 0.061[C]$ | 0.061                                 | 0.9916 |

**Table S2.** Determination results of ethion in real water samples (n = 3).

| <b>Sample</b> | <b>Added (<math>\mu\text{gL}^{-1}</math>)</b> | <b>Found (<math>\mu\text{gL}^{-1}</math>)</b> | <b>Recovery (% , n = 3)</b> | <b>RSD (% , n = 3)</b> |
|---------------|-----------------------------------------------|-----------------------------------------------|-----------------------------|------------------------|
| Tap water     | 50                                            | 48.5                                          | 97                          | 3.4                    |
|               | 100                                           | 94.6                                          | 94                          | 1.9                    |
| River water   | 50                                            | 46.7                                          | 93                          | 3.1                    |
|               | 100                                           | 93.6                                          | 93                          | 4.4                    |

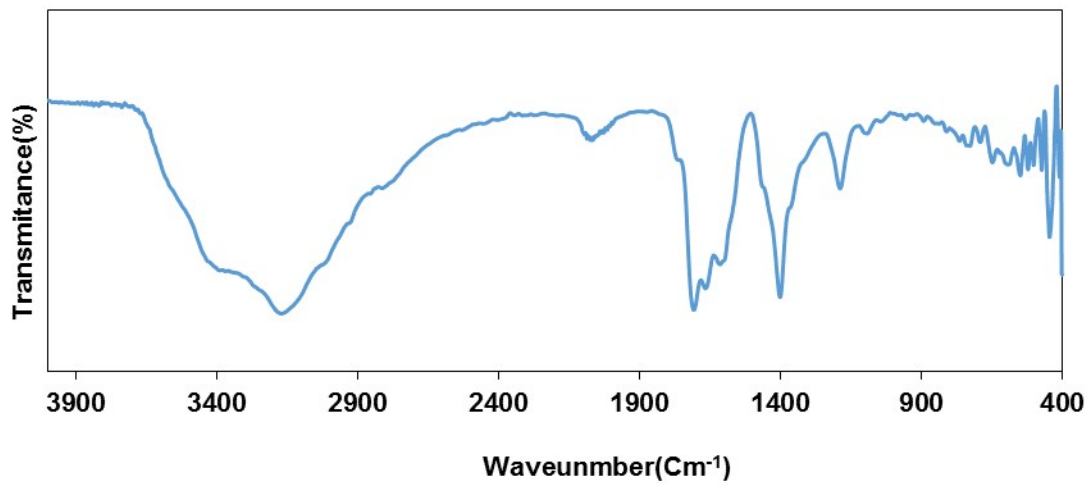

**Fig. S1.** FTIR spectrum of N,S-GQDs

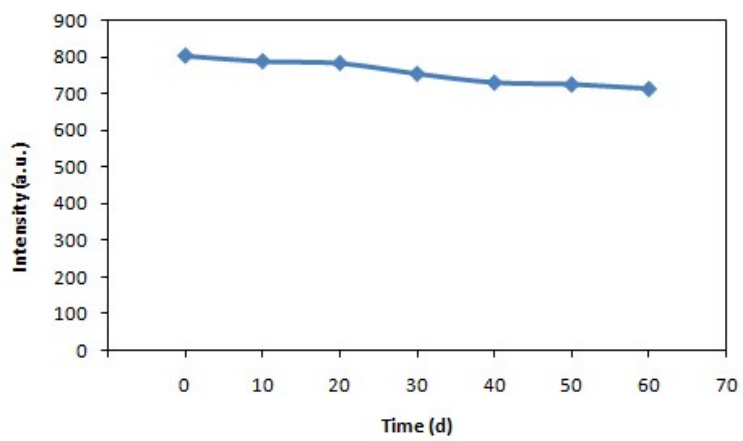

**Fig. S2.** Stability of fluorescence response of the N,S-GQDs solution with time

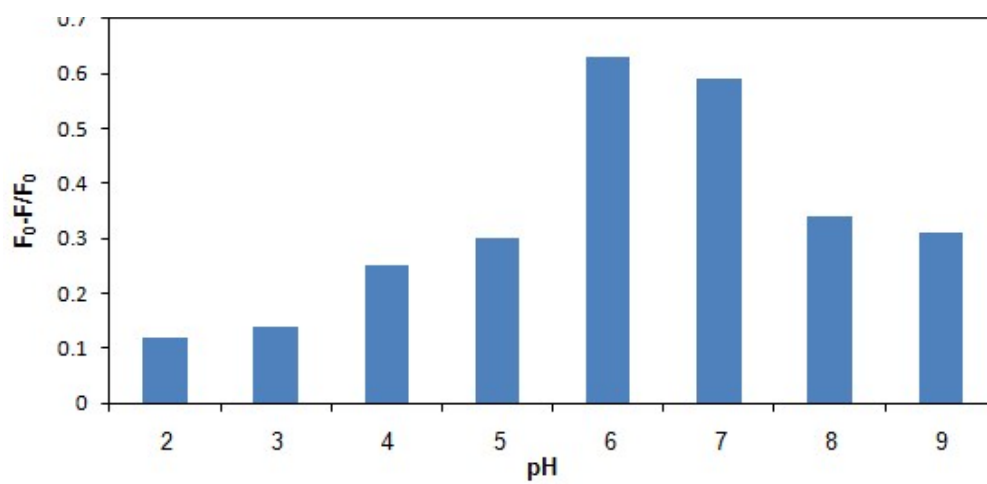

**Fig. S3.** Effect of pH on the quenching efficiency of Hg<sup>2+</sup> ion.

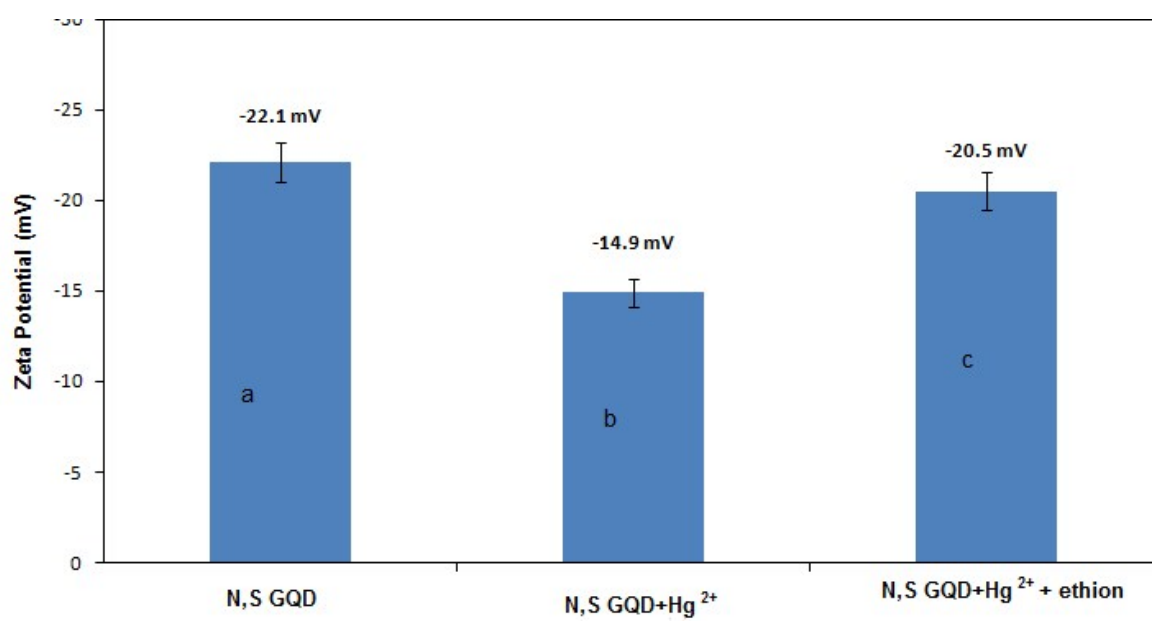

**Fig. S4.** Zeta potential of N,S GQDs (a), in the presence of Hg<sup>2+</sup> (b), and in the presence of Hg<sup>2+</sup> and ethion (c).

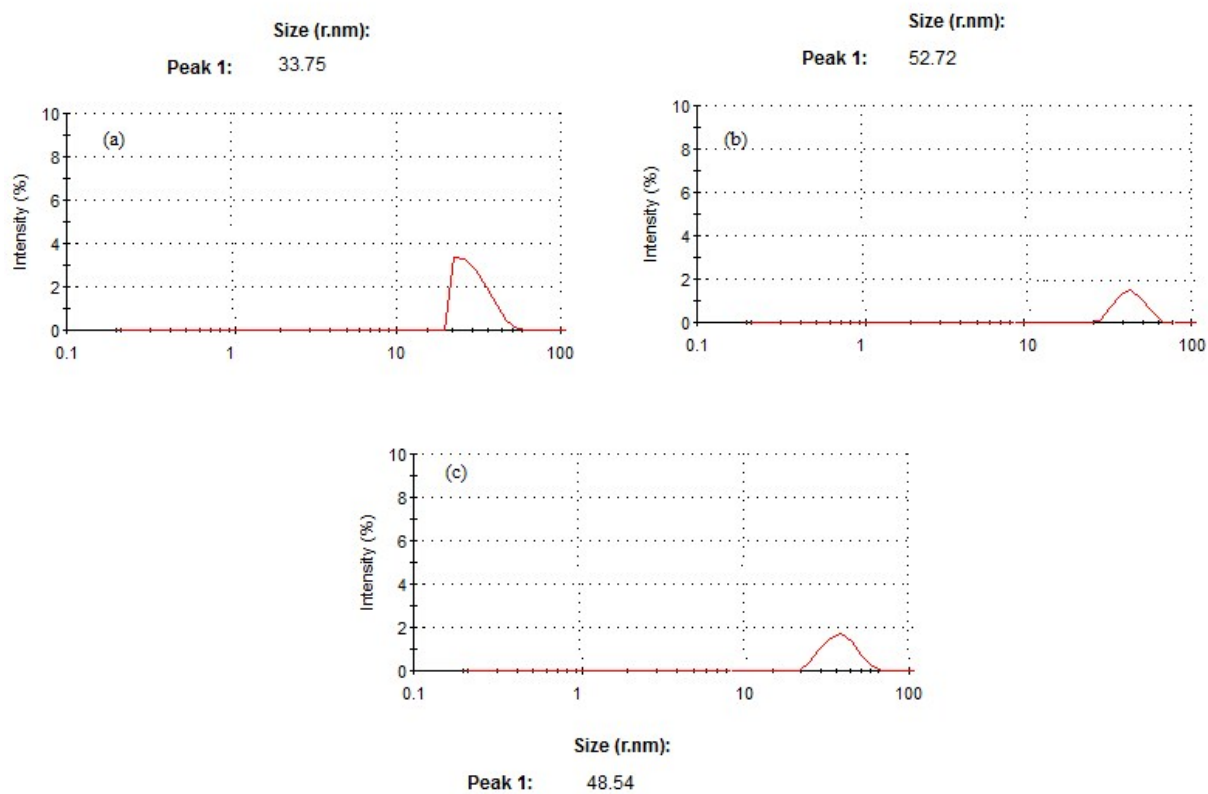

**Fig. S5.** The hydrodynamic size of N,S GQDs (a), in the presence of  $\text{Hg}^{2+}$  (b), and in the presence of  $\text{Hg}^{2+}$  and ethion (c).

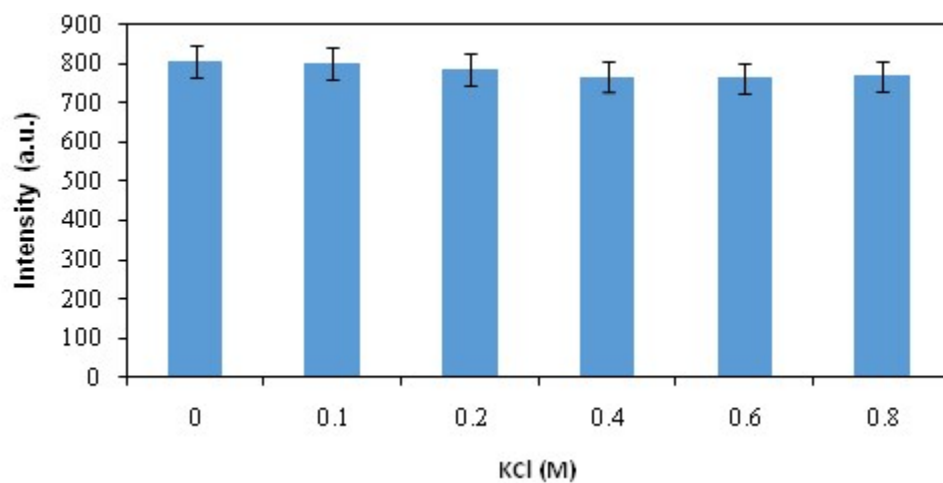

**Fig. S6.** Effect of kCl concentration on the fluorescence response N,S/GQDs
